# Supplementary material for: Two extended structures constructed from sandwich-type polyoxometalates functionalized by organic amines
Source: Royal Society of Chemistry journal article supplement (doi:10.1039/b712903c), 2007-11-06
Supplement: b712903c.pdf [file b712903c.pdf]

## Supplementary Materials

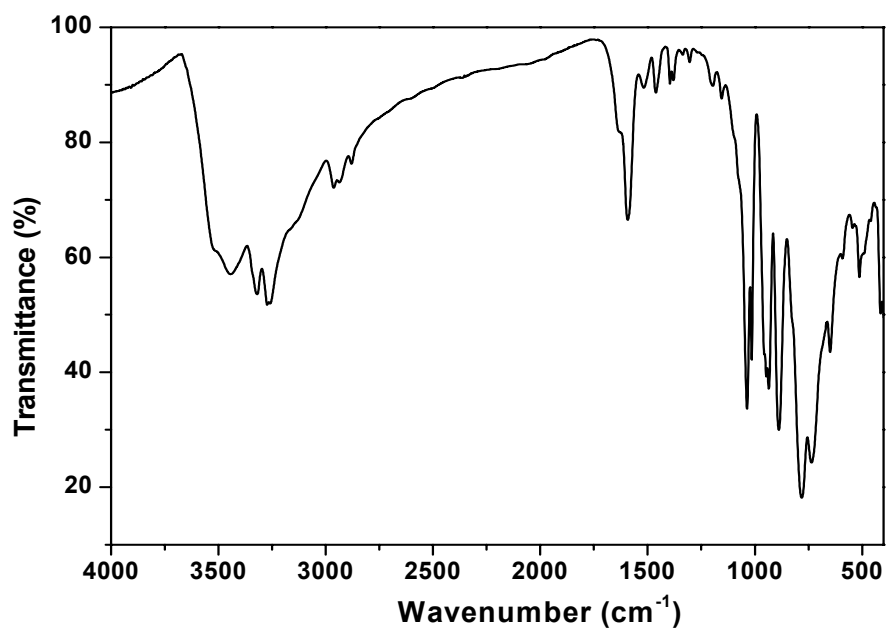

**Fig.S1** FT-IR spectrum of compound 1.

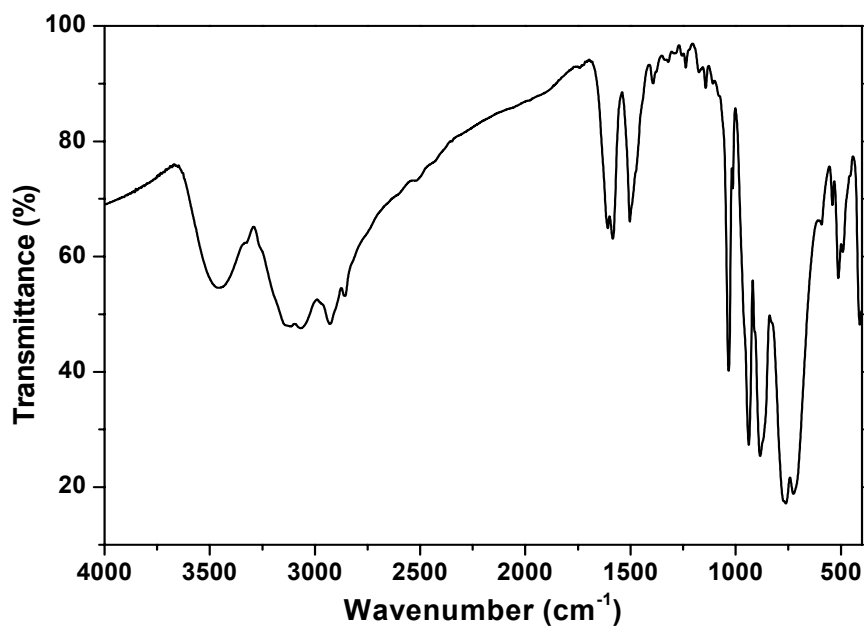

**Fig.S2** FT-IR spectrum of compound 2.

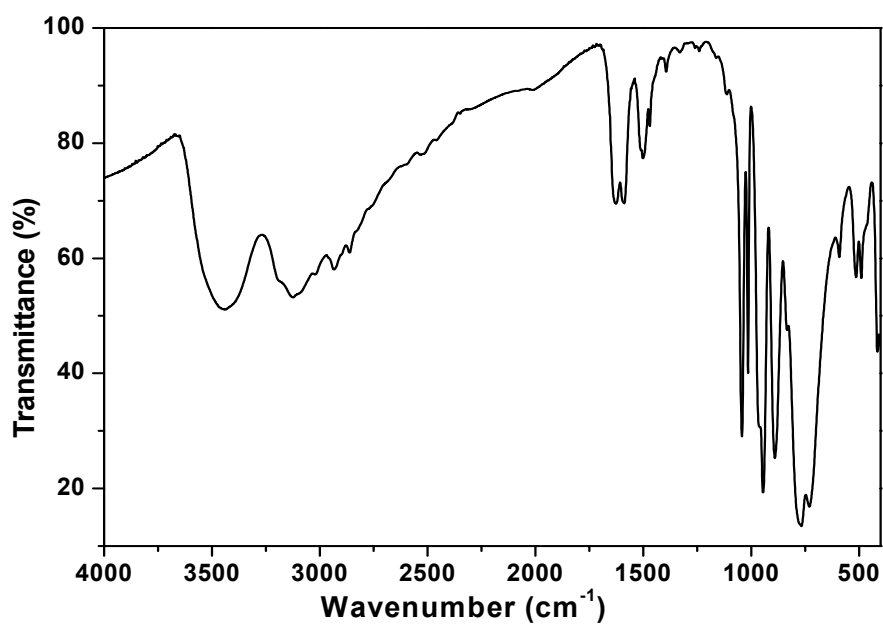

**Fig.S3** FT-IR spectrum of compound 3.

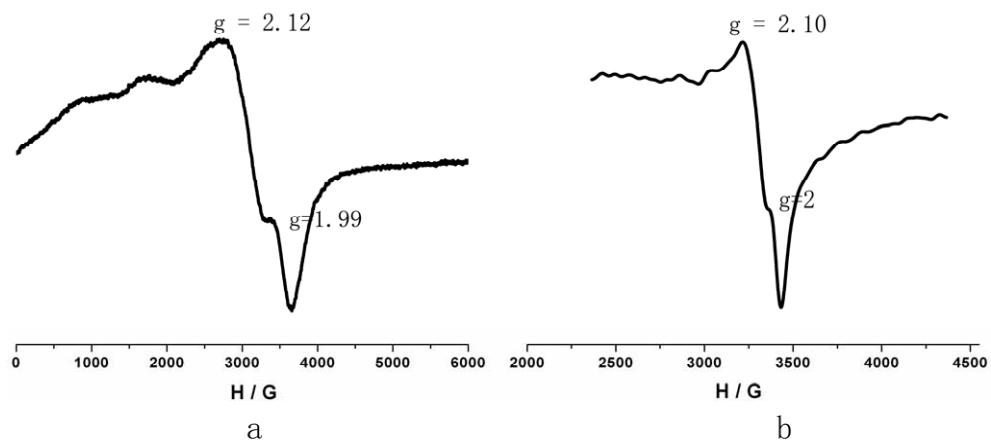

**Fig. S4.** The EPR spectra for **1** (a) and **2** (b) measured at room temperature.

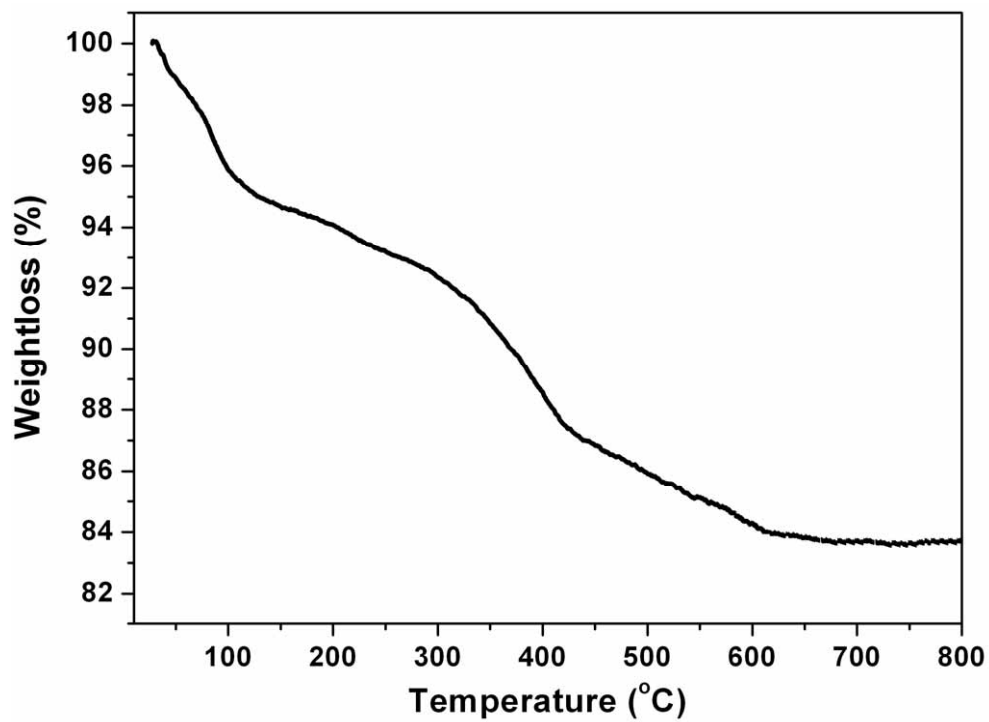

Fig. S5. TG curve for compound 1.

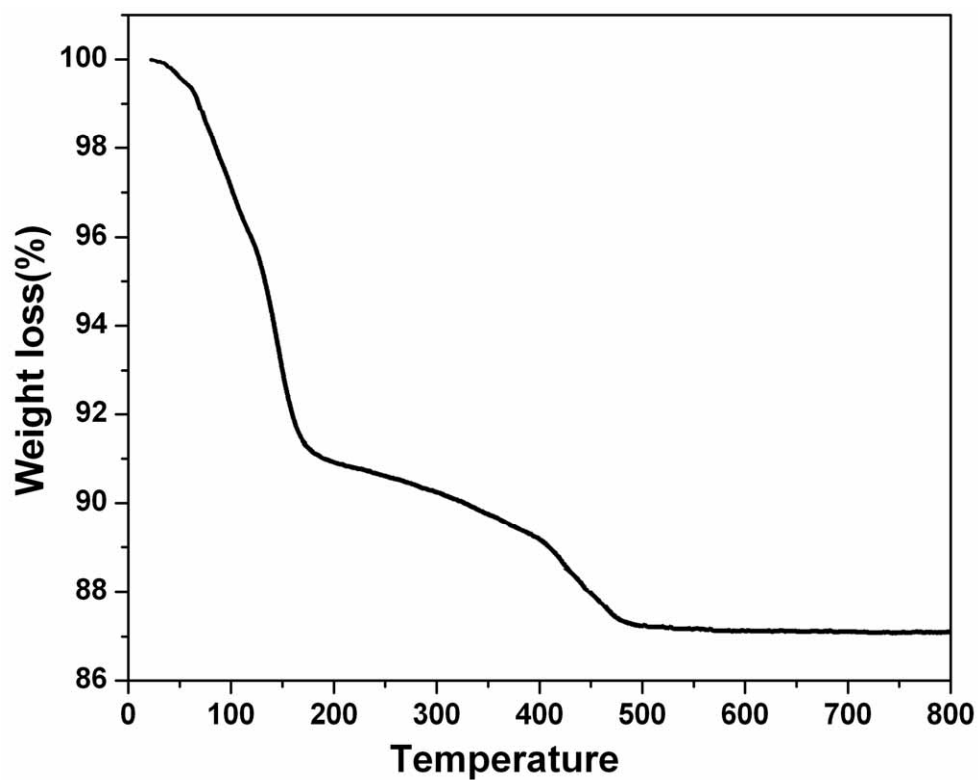

Fig. S6. TG curve for compound 2.

**Table S1.** Selected bond lengths [ $\text{\AA}$ ] and angles [ $^\circ$ ] for **1** and **2**.

| <b>Compound 1</b> |           |               |           |
|-------------------|-----------|---------------|-----------|
| W(1)-O(18)        | 1.743(9)  | W(2)-O(8)     | 1.762(9)  |
| W(1)-O(28)        | 1.769(9)  | W(2)-O(24)    | 1.775(10) |
| W(1)-O(20)#1      | 1.885(9)  | W(2)-O(10)    | 1.912(9)  |
| W(1)-O(4)         | 2.000(10) | W(2)-O(12)#1  | 1.987(10) |
| W(1)-O(6)         | 2.003(10) | W(2)-O(27)    | 2.048(10) |
| W(1)-O(29)        | 2.411(9)  | W(2)-O(26)    | 2.434(10) |
| W(3)-O(17)        | 1.734(9)  | W(4)-O(13)    | 1.711(10) |
| W(3)-O(19)        | 1.820(10) | W(4)-O(1)     | 1.775(9)  |
| W(3)-O(2)         | 1.863(11) | W(4)-O(20)    | 1.930(10) |
| W(3)-O(11)#1      | 1.935(10) | W(4)-O(15)    | 1.938(10) |
| W(3)-O(16)#1      | 1.944(10) | W(4)-O(19)    | 2.043(10) |
| W(3)-O(32)        | 2.520(9)  | W(4)-O(32)    | 2.487(9)  |
| W(5)-O(33)        | 1.756(9)  | W(6)-O(22)    | 1.701(10) |
| W(5)-O(9)         | 1.839(9)  | W(6)-O(4)     | 1.882(10) |
| W(5)-O(12)        | 1.900(10) | W(6)-O(11)    | 1.892(10) |
| W(5)-O(30)        | 1.934(11) | W(6)-O(21)    | 1.897(10) |
| W(5)-O(5)         | 1.991(10) | W(6)-O(7)     | 1.907(10) |
| W(5)-O(26)#1      | 2.417(9)  | W(6)-O(29)    | 2.498(9)  |
| W(7)-O(31)        | 1.752(9)  | W(8)-O(14)    | 1.733(10) |
| W(7)-O(27)#1      | 1.855(10) | W(8)-O(25)    | 1.774(9)  |
| W(7)-O(5)         | 1.894(10) | W(8)-O(15)    | 1.923(9)  |
| W(7)-O(16)        | 1.901(9)  | W(8)-O(10)    | 1.930(9)  |
| W(7)-O(7)         | 1.932(10) | W(8)-O(2)     | 2.001(9)  |
| W(7)-O(26)#1      | 2.491(9)  | W(8)-O(32)    | 2.393(10) |
| W(9)-O(34)        | 1.760(10) | W(9)-O(29)    | 2.416(9)  |
| W(9)-O(3)         | 1.810(10) | P(1)-O(32)#1  | 1.531(10) |
| W(9)-O(6)         | 1.850(10) | P(1)-O(26)#1  | 1.539(10) |
| W(9)-O(30)        | 1.929(10) | P(1)-O(23)#1  | 1.542(10) |
| W(9)-O(21)        | 1.983(10) | P(1)-O(29)    | 1.555(10) |
| Ni(1)-O(24)       | 1.976(10) | Ni(2)-O(25)   | 2.002(9)  |
| Ni(1)-O(28)       | 1.986(9)  | Ni(2)-O(1)    | 2.010(10) |
| Ni(1)-O(9)#1      | 2.045(10) | Ni(2)-O(9)    | 2.057(9)  |
| Ni(1)-O(3)        | 2.052(11) | Ni(2)-O(3)    | 2.097(9)  |
| Ni(1)-O(23)       | 2.158(9)  | Ni(2)-N(1)    | 2.108(14) |
| Ni(1)-O(23)#1     | 2.168(9)  | Ni(2)-O(23)   | 2.217(10) |
| Ni(3)-N(3)        | 2.073(11) | Ni(4)-N(2)#3  | 2.064(13) |
| Ni(3)-N(3)#2      | 2.073(11) | Ni(4)-N(2)    | 2.064(13) |
| Ni(3)-N(5)#2      | 2.105(14) | Ni(4)-O(14)   | 2.087(10) |
| Ni(3)-N(5)        | 2.105(14) | Ni(4)-O(14)#3 | 2.087(10) |
| Ni(3)-O(18)#2     | 2.162(10) | Ni(4)-N(6)    | 2.099(13) |

|                      |            |                      |            |
|----------------------|------------|----------------------|------------|
| Ni(3)-O(18)          | 2.162(10)  | Ni(4)-N(6)#3         | 2.099(13)  |
| Ni(5)-N(11)          | 1.99(2)    | Ni(5)-N(10)          | 2.08(2)    |
| Ni(5)-N(7)           | 2.053(17)  | Ni(5)-O(35)          | 2.16(2)    |
| Ni(5)-N(4)           | 2.079(13)  | Ni(5)-O(17)          | 2.175(10)  |
| O(24)-Ni(1)-O(28)    | 93.7(4)    | O(25)-Ni(2)-O(1)     | 93.9(4)    |
| O(24)-Ni(1)-O(9)#1   | 96.4(4)    | O(25)-Ni(2)-O(9)     | 169.2(4)   |
| O(28)-Ni(1)-O(9)#1   | 91.1(4)    | O(1)-Ni(2)-O(9)      | 90.6(4)    |
| O(24)-Ni(1)-O(3)     | 91.3(4)    | O(25)-Ni(2)-O(3)     | 89.2(4)    |
| O(28)-Ni(1)-O(3)     | 95.1(4)    | O(1)-Ni(2)-O(3)      | 171.8(4)   |
| O(9)#1-Ni(1)-O(3)    | 169.8(4)   | O(9)-Ni(2)-O(3)      | 85.1(4)    |
| O(24)-Ni(1)-O(23)    | 91.5(3)    | O(25)-Ni(2)-N(1)     | 90.9(5)    |
| O(28)-Ni(1)-O(23)    | 174.8(4)   | O(1)-Ni(2)-N(1)      | 89.1(5)    |
| O(9)#1-Ni(1)-O(23)   | 88.7(4)    | O(9)-Ni(2)-N(1)      | 99.1(5)    |
| O(3)-Ni(1)-O(23)     | 84.4(4)    | O(3)-Ni(2)-N(1)      | 98.5(5)    |
| O(24)-Ni(1)-O(23)#1  | 177.1(3)   | O(25)-Ni(2)-O(23)    | 87.6(4)    |
| O(28)-Ni(1)-O(23)#1  | 89.2(4)    | O(1)-Ni(2)-O(23)     | 90.7(4)    |
| O(9)#1-Ni(1)-O(23)#1 | 84.0(4)    | O(9)-Ni(2)-O(23)     | 82.4(4)    |
| O(3)-Ni(1)-O(23)#1   | 88.0(4)    | O(3)-Ni(2)-O(23)     | 81.9(4)    |
| O(23)-Ni(1)-O(23)#1  | 85.6(3)    | N(1)-Ni(2)-O(23)     | 178.5(4)   |
| N(3)-Ni(3)-N(3)#2    | 180.000(2) | N(2)#3-Ni(4)-N(2)    | 180.000(2) |
| N(3)-Ni(3)-N(5)#2    | 97.5(5)    | N(2)#3-Ni(4)-O(14)   | 89.4(4)    |
| N(3)#2-Ni(3)-N(5)#2  | 82.5(5)    | N(2)-Ni(4)-O(14)     | 90.6(4)    |
| N(3)-Ni(3)-N(5)      | 82.5(5)    | N(2)#3-Ni(4)-O(14)#3 | 90.6(4)    |
| N(3)#2-Ni(3)-N(5)    | 97.5(5)    | N(2)-Ni(4)-O(14)#3   | 89.4(4)    |
| N(5)#2-Ni(3)-N(5)    | 180.000(2) | O(14)-Ni(4)-O(14)#3  | 180.0(4)   |
| N(3)-Ni(3)-O(18)#2   | 89.4(4)    | N(2)#3-Ni(4)-N(6)    | 98.6(5)    |
| N(3)#2-Ni(3)-O(18)#2 | 90.6(4)    | N(2)-Ni(4)-N(6)      | 81.4(5)    |
| N(5)#2-Ni(3)-O(18)#2 | 89.5(5)    | O(14)-Ni(4)-N(6)     | 90.4(5)    |
| N(5)-Ni(3)-O(18)#2   | 90.5(5)    | O(14)#3-Ni(4)-N(6)   | 89.6(5)    |
| N(3)-Ni(3)-O(18)     | 90.6(4)    | N(2)#3-Ni(4)-N(6)#3  | 81.4(5)    |
| N(3)#2-Ni(3)-O(18)   | 89.4(4)    | N(2)-Ni(4)-N(6)#3    | 98.6(5)    |
| N(5)#2-Ni(3)-O(18)   | 90.5(5)    | O(14)-Ni(4)-N(6)#3   | 89.6(5)    |
| N(5)-Ni(3)-O(18)     | 89.5(5)    | O(14)#3-Ni(4)-N(6)#3 | 90.4(5)    |
| O(18)#2-Ni(3)-O(18)  | 180.000(2) | N(6)-Ni(4)-N(6)#3    | 180.0(6)   |
| N(11)-Ni(5)-N(7)     | 96.9(9)    | N(4)-Ni(5)-O(35)     | 93.2(7)    |
| N(11)-Ni(5)-N(4)     | 92.8(8)    | N(10)-Ni(5)-O(35)    | 89.8(8)    |
| N(7)-Ni(5)-N(4)      | 81.7(6)    | N(11)-Ni(5)-O(17)    | 174.5(8)   |
| N(11)-Ni(5)-N(10)    | 88.4(9)    | N(7)-Ni(5)-O(17)     | 87.7(6)    |
| N(7)-Ni(5)-N(10)     | 95.1(8)    | N(4)-Ni(5)-O(17)     | 90.9(4)    |
| N(4)-Ni(5)-N(10)     | 176.7(8)   | N(10)-Ni(5)-O(17)    | 88.2(7)    |
| N(11)-Ni(5)-O(35)    | 90.7(9)    | O(35)-Ni(5)-O(17)    | 85.0(7)    |
| N(7)-Ni(5)-O(35)     | 171.1(7)   |                      |            |
| <b>Compound 2</b>    |            |                      |            |

|                       |           |                     |           |
|-----------------------|-----------|---------------------|-----------|
| W(1)-O(31)            | 1.714(15) | W(2)-O(26)          | 1.691(18) |
| W(1)-O(18)            | 1.793(13) | W(2)-O(10)          | 1.814(14) |
| W(1)-O(20)            | 1.886(15) | W(2)-O(4)           | 1.900(14) |
| W(1)-O(5)             | 1.965(17) | W(2)-O(7)           | 1.927(13) |
| W(1)-O(8)             | 2.020(14) | W(2)-O(15)          | 2.015(15) |
| W(1)-O(24)            | 2.392(13) | W(2)-O(17)          | 2.381(16) |
| W(3)-O(25)            | 1.742(16) | W(4)-O(33)          | 1.669(15) |
| W(3)-O(6)             | 1.781(13) | W(4)-O(21)          | 1.839(17) |
| W(3)-O(9)             | 1.886(17) | W(4)-O(22)          | 1.863(16) |
| W(3)-O(4)             | 1.958(16) | W(4)-O(2)           | 1.918(15) |
| W(3)-O(13)            | 1.999(14) | W(4)-O(1)           | 1.949(17) |
| W(3)-O(17)            | 2.355(13) | W(4)-O(12)#1        | 2.487(13) |
| W(5)-O(14)            | 1.702(17) | W(6)-O(34)          | 1.696(16) |
| W(5)-O(30)#1          | 1.757(13) | W(6)-O(32)          | 1.859(19) |
| W(5)-O(16)            | 1.906(16) | W(6)-O(8)           | 1.862(15) |
| W(5)-O(20)            | 1.953(15) | W(6)-O(3)           | 1.894(15) |
| W(5)-O(21)            | 2.052(15) | W(6)-O(2)           | 1.916(16) |
| W(5)-O(12)#1          | 2.376(15) | W(6)-O(24)          | 2.519(11) |
| W(7)-O(28)            | 1.788(13) | W(8)-O(23)          | 1.692(16) |
| W(7)-O(19)            | 1.819(12) | W(8)-O(13)          | 1.857(14) |
| W(7)-O(7)             | 1.924(14) | W(8)-O(1)           | 1.879(17) |
| W(7)-O(5)             | 1.928(17) | W(8)-O(15)          | 1.880(17) |
| W(7)-O(32)            | 2.036(15) | W(8)-O(3)           | 1.960(14) |
| W(7)-O(24)            | 2.342(14) | W(8)-O(17)          | 2.529(14) |
| W(9)-O(27)            | 1.758(14) | W(9)-O(12)#1        | 2.451(14) |
| W(9)-O(29)            | 1.760(14) | P(1)-O(12)          | 1.534(16) |
| W(9)-O(9)             | 1.931(18) | P(1)-O(17)#1        | 1.581(16) |
| W(9)-O(16)            | 1.955(17) | P(1)-O(11)          | 1.582(12) |
| W(9)-O(22)            | 1.998(14) | P(1)-O(24)#1        | 1.590(13) |
| Ni(1)-O(6)            | 2.006(13) | Ni(2)-O(27)#1       | 2.023(14) |
| Ni(1)-O(18)#1         | 2.010(14) | Ni(2)-O(30)         | 2.056(14) |
| Ni(1)-O(10)           | 2.058(16) | Ni(2)-N(1)          | 2.08(2)   |
| Ni(1)-O(19)#1         | 2.069(15) | Ni(2)-O(19)         | 2.085(13) |
| Ni(1)-O(11)#1         | 2.138(12) | Ni(2)-O(10)         | 2.123(15) |
| Ni(1)-O(11)           | 2.143(14) | Ni(2)-O(11)         | 2.153(14) |
| O(6)-Ni(1)-O(18)#1    | 90.1(6)   | O(27)#1-Ni(2)-O(30) | 94.5(5)   |
| O(6)-Ni(1)-O(10)      | 93.6(6)   | O(27)#1-Ni(2)-N(1)  | 88.3(7)   |
| O(18)#1-Ni(1)-O(10)   | 91.3(6)   | O(30)-Ni(2)-N(1)    | 90.8(7)   |
| O(6)-Ni(1)-O(19)#1    | 92.7(6)   | O(27)#1-Ni(2)-O(19) | 91.4(5)   |
| O(18)#1-Ni(1)-O(19)#1 | 95.1(6)   | O(30)-Ni(2)-O(19)   | 171.1(6)  |
| O(10)-Ni(1)-O(19)#1   | 171.1(6)  | N(1)-Ni(2)-O(19)    | 96.1(7)   |
| O(6)-Ni(1)-O(11)#1    | 92.2(5)   | O(27)#1-Ni(2)-O(10) | 172.1(6)  |
| O(18)#1-Ni(1)-O(11)#1 | 177.2(6)  | O(30)-Ni(2)-O(10)   | 89.1(5)   |

|                       |          |                     |          |
|-----------------------|----------|---------------------|----------|
| O(10)-Ni(1)-O(11)#1   | 90.1(5)  | N(1)-Ni(2)-O(10)    | 98.6(7)  |
| O(19)#1-Ni(1)-O(11)#1 | 83.4(5)  | O(19)-Ni(2)-O(10)   | 84.2(5)  |
| O(6)-Ni(1)-O(11)      | 176.9(5) | O(27)#1-Ni(2)-O(11) | 90.5(6)  |
| O(18)#1-Ni(1)-O(11)   | 92.2(5)  | O(30)-Ni(2)-O(11)   | 90.6(5)  |
| O(10)-Ni(1)-O(11)     | 84.2(6)  | N(1)-Ni(2)-O(11)    | 178.2(7) |
| O(19)#1-Ni(1)-O(11)   | 89.2(5)  | O(19)-Ni(2)-O(11)   | 82.6(5)  |
| O(11)#1-Ni(1)-O(11)   | 85.5(5)  | O(10)-Ni(2)-O(11)   | 82.4(6)  |

Symmetry transformations used to generate equivalent atoms: for 1: #1  $-x-2, -y-4, -z+4$ ;  
#2  $-x-3, -y-4, -z+4$ ; #3  $-x-2, -y-4, -z+3$ ; for 2: #1  $-x, -y, -z$ ; #2  $x-1, y, z$ ; #3  $-x+1, -y, -z+1$ ;  
#4  $x+1, y, z$ .
